# Supplementary material
Source: publisher figshare collection journal article supplement (https://tandf.figshare.com/articles/dataset/_/14363463)
Supplement: Supplementary file 1 [file 3]

**Table S1.** Body weight of control, *ulk1 ulk2*-cDKO, *atg14*-cKO, and *rb1cc1*-cKO mice at 2 months.

| Sex    | Control                | <i>ulk1 ulk2</i> -cDKO | Control               | <i>atg14</i> -cKO     | Control               | <i>rb1cc1</i> -cKO    |
|--------|------------------------|------------------------|-----------------------|-----------------------|-----------------------|-----------------------|
| Male   | 24.2 ± 0.8<br>(n = 15) | 27.1 ± 1.2<br>(n = 8)  | 24 ± 0.5<br>(n = 9)   | 23.6 ± 1<br>(n = 6)   | 25.4 ± 1.3<br>(n = 9) | 26.3 ± 1.3<br>(n = 6) |
| Female | 20.9 ± 0.4<br>(n = 8)  | 21.4 ± 1<br>(n = 5)    | 20.6 ± 0.3<br>(n = 9) | 21.3 ± 0.5<br>(n = 3) | 21.3 ± 0.6<br>(n = 3) | 22.3 ± 1<br>(n = 4)   |
