# Supplementary material
Source: publisher figshare collection journal article supplement (https://tandf.figshare.com/articles/dataset/_/14363463)
Supplement: Supplementary file 5 [file 3]

**Table S2.** Metabolic parameters in the serum of control, *ulk1 ulk2*-cDKO, *atg14*-cKO, and *rb1cc1*-cKO mice at 2 months.

| Metabolite             | Control                  | <i>ulk1 ulk2</i> -cDKO  | Control                 | <i>atg14</i> -cKO      | Control                 | <i>rb1cc1</i> -cKO      |
|------------------------|--------------------------|-------------------------|-------------------------|------------------------|-------------------------|-------------------------|
| Albumin<br>(g/dL)      | 3.3 ± 0.3<br>(n = 11)    | 3.2 ± 0.1<br>(n = 7)    | 3.3 ± 0.1<br>(n = 8)    | 3.1 ± 0.1<br>(n = 7)   | 3.1 ± 0.1<br>(n = 10)   | 3.2 ± 0.2<br>(n = 8)    |
| Alk Phos<br>(U/L)      | 134.8 ± 13.1<br>(n = 11) | 160.9 ± 21.4<br>(n = 7) | 113.5 ± 13.0<br>(n = 8) | 125.5 ± 7.7<br>(n = 7) | 90.0 ± 8.1<br>(n = 10)  | 108.1 ± 17.1<br>(n = 8) |
| Amylase<br>(U/L)       | 2984 ± 571<br>(n = 11)   | 3187 ± 415<br>(n = 7)   | 2735 ± 127<br>(n = 8)   | 2796 ± 140<br>(n = 7)  | 2901 ± 196<br>(n = 10)  | 2649 ± 216<br>(n = 8)   |
| Cholesterol<br>(mg/dL) | 126 ± 21<br>(n = 11)     | 106 ± 4<br>(n = 7)      | 125 ± 16<br>(n = 8)     | 173 ± 43<br>(n = 7)    | 159 ± 32<br>(n = 9)     | 159 ± 23<br>(n = 8)     |
| HDL<br>(mg/dL)         | 55.3 ± 6.6<br>(n = 10)   | 66.5 ± 5.2<br>(n = 7)   | 66.6 ± 4.1<br>(n = 8)   | 75.1 ± 6.0<br>(n = 7)  | 66.6 ± 4.8<br>(n = 10)  | 72.4 ± 9.2<br>(n = 8)   |
| LDL<br>(mg/dL)         | 5.9 ± 0.5<br>(n = 10)    | 6.2 ± 0.6<br>(n = 7)    | 5.2 ± 0.7<br>(n = 8)    | 6.3 ± 0.7<br>(n = 7)   | 5.8 ± 0.4<br>(n = 10)   | 6.9 ± 1.1<br>(n = 7)    |
| Uric acid<br>(mg/dL)   | 2.12 ± 0.27<br>(n = 11)  | 2.86 ± 0.47<br>(n = 7)  | 2.36 ± 0.53<br>(n = 8)  | 2.29 ± 0.45<br>(n = 7) | 2.62 ± 0.26<br>(n = 10) | 2.68 ± 0.32<br>(n = 8)  |
| Glucose<br>(mg/dL)     | 179.9 ± 13<br>(n = 11)   | 159.4 ± 9<br>(n = 7)    | 203.7 ± 13<br>(n = 8)   | 215.1 ± 12<br>(n = 7)  | 234.7 ± 15<br>(n = 10)  | 216.5 ± 10<br>(n = 8)   |

**Abbreviations:** Alk Phos, alkaline phosphatase; HDL, high-density lipoprotein; LDL, low-density lipoprotein
