# Supplementary material
Source: publisher figshare collection journal article supplement (https://tandf.figshare.com/articles/dataset/_/14363463)

Figure S2. Skeletal muscle phenotypes in *ulk1 ulk2*-cDKO, *atg14*-cKO, and *rb1cc1*-cKO mice

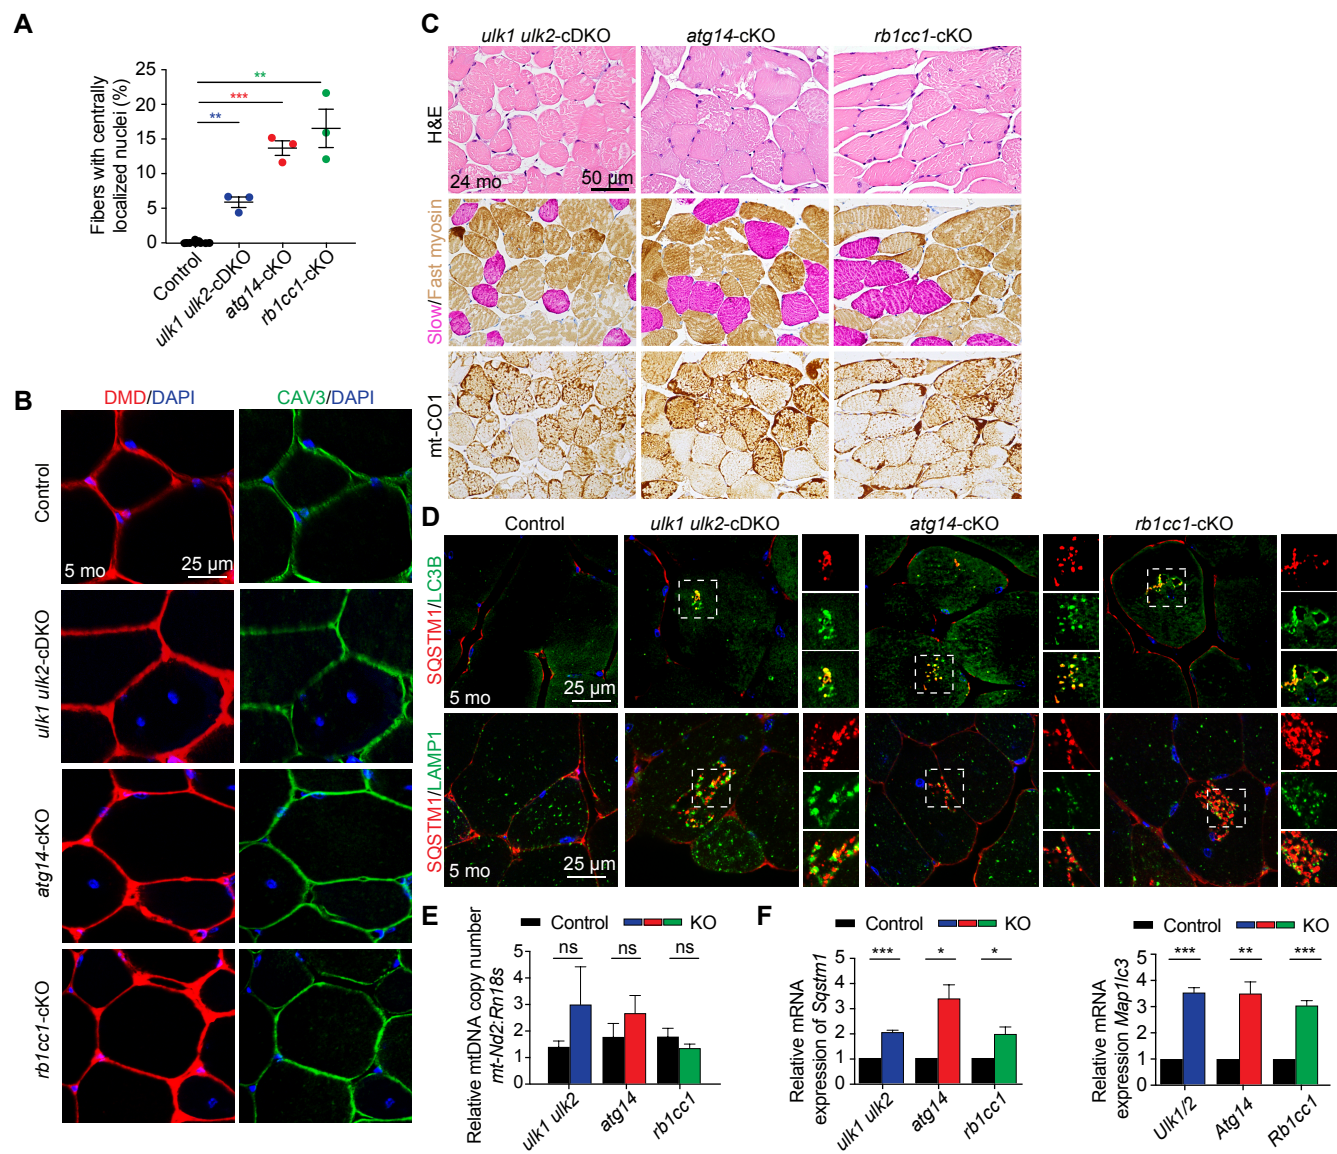

Supplement: Supplementary file 2 [file 3]

Figure S3. RNA binding proteins in skeletal muscles of *ulk1 ulk2*-cDKO, *atg14*-cKO, and *rb1cc1*-cKO mice

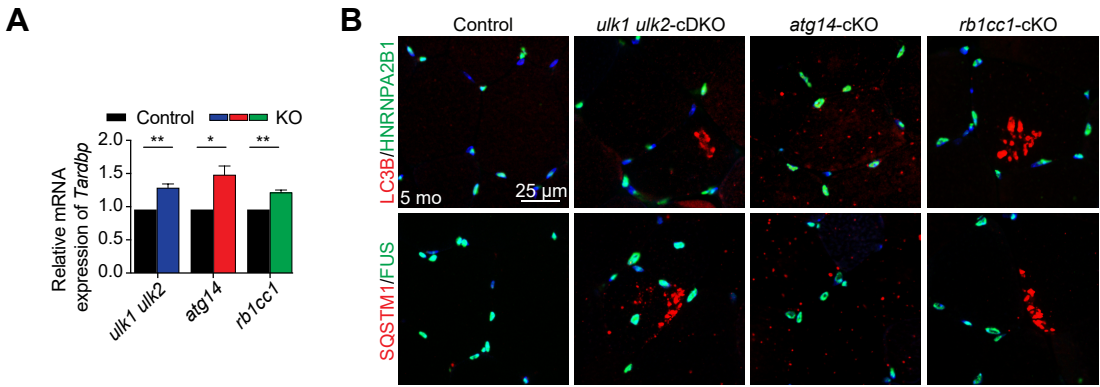

Supplement: Supplementary file 3 [file 3]

Figure S1. Cardiac muscle phenotypes in *ULK1 ULK2*-cDKO, *atg14*-cKO, *rb1cc1*-cKO and *atg7*-cKO mice

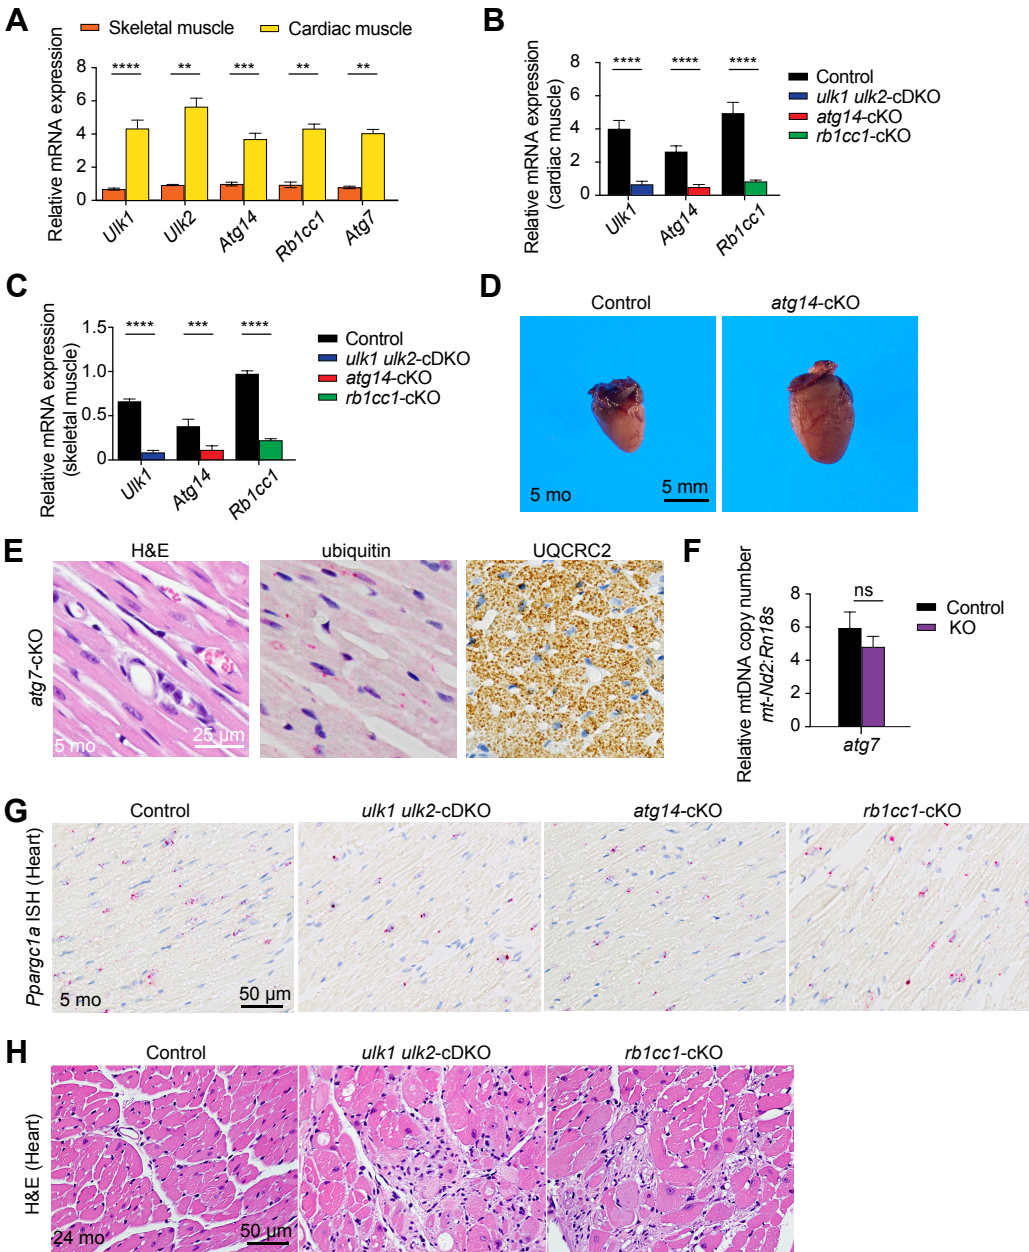

Supplement: Supplementary file 4 [file 3]
